# Supplementary material for: Retracted: Treadmill Training Increases SIRT-1 and PGC-1α Protein Levels and AMPK Phosphorylation in Quadriceps of Middle-Aged Rats in an Intensity-Dependent Manner
Source: Hindawi journal article supplement (doi:10.1155/2017/8287646), 2017-10-16
Supplement: f1 [file 8287646.f1.zip › Supplemetary Materials/The original blots (Mediators of Inflammation).pdf]

# The Original Blots

MEDIATORS OF INFLAMMATION

# TNF- $\alpha$

Y = Young

M = Middle Aged

## Groups

1, 7, 13, 19, 25, 31 = Young/NE

2, 8, 14, 20, 26, 32 = Middle-Aged/NE

3, 9, 15, 21, 27, 33 = Young/0,8 Km/h

4, 10, 16, 22, 28, 34 = Middle-Aged/0,8 Km/h

5, 11, 17, 23, 29, 35 = Young/1,2 Km/h

6, 12, 18, 24, 30, 36 = Middle-Aged/1,2 Km/h

| Y  | M | Y        | M | Y        | M |
|----|---|----------|---|----------|---|
| NE |   | 0,8 Km/h |   | 1,2 Km/h |   |

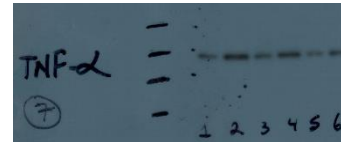

ASSAY 1

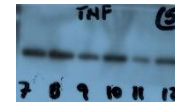

ASSAY 2

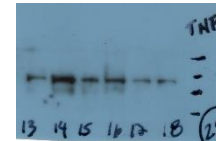

ASSAY 3

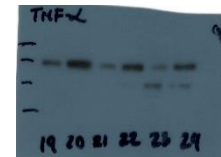

ASSAY 4

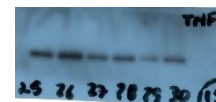

ASSAY 5

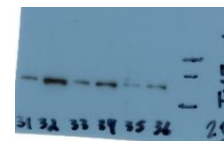

ASSAY 6

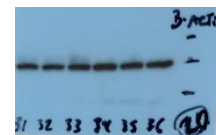

ASSAY 7/ $\beta$ -Actin

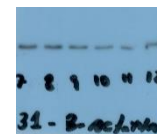

ASSAY 8/ $\beta$ -Actin

# IL-1 $\beta$

Y = Young

M = Middle Aged

## Groups

1, 7, 13, 19, 25, 31 = Young/NE

2, 8, 14, 20, 26, 32 = Middle-Aged/NE

3, 9, 15, 21, 27, 33 = Young/0,8 Km/h

4, 10, 16, 22, 28, 34 = Middle-Aged/0,8 Km/h

5, 11, 17, 23, 29, 35 = Young/1,2 Km/h

6, 12, 18, 24, 30, 36 = Middle-Aged/1,2 Km/h

| Y | M  | Y | M        | Y | M        |
|---|----|---|----------|---|----------|
|   |    |   |          |   |          |
|   | NE |   | 0,8 Km/h |   | 1,2 Km/h |

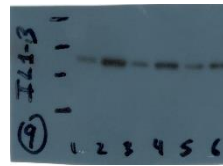

ASSAY 1

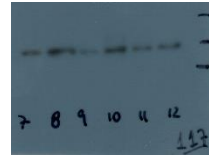

ASSAY 2

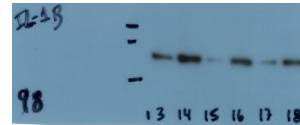

ASSAY 3

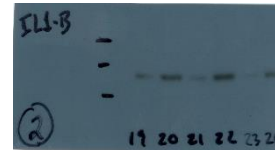

ASSAY 4

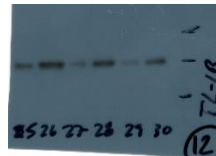

ASSAY 5

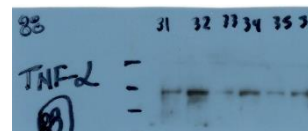

ASSAY 6

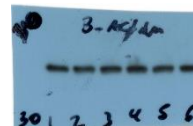

ASSAY 7/ $\beta$ -Actin

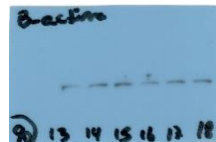

ASSAY 8/ $\beta$ -Actin

# NF- $\kappa$ B

Y = Young

M = Middle Aged

## Groups

1, 7, 13, 19, 25, 31 = Young/NE

2, 8, 14, 20, 26, 32 = Middle-Aged/NE

3, 9, 15, 21, 27, 33 = Young/0,8 Km/h

4, 10, 16, 22, 28, 34 = Middle-Aged/0,8 Km/h

5, 11, 17, 23, 29, 35 = Young/1,2 Km/h

6, 12, 18, 24, 30, 36 = Middle-Aged/1,2 Km/h

| Y  | M | Y        | M | Y        | M |
|----|---|----------|---|----------|---|
| NE |   | 0,8 Km/h |   | 1,2 Km/h |   |

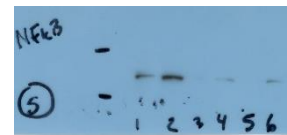

ASSAY 1

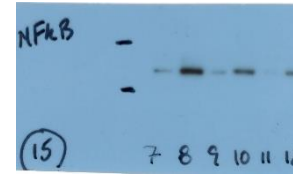

ASSAY 2

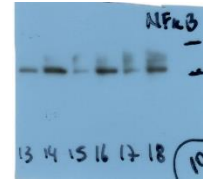

ASSAY 3

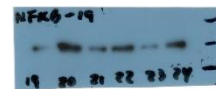

ASSAY 4

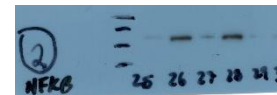

ASSAY 5

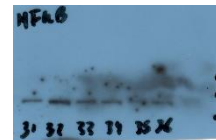

ASSAY 6

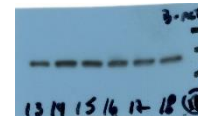

ASSAY 7/ $\beta$ -Actin

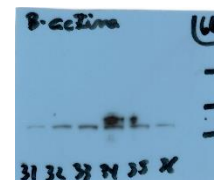

ASSAY 8/ $\beta$ -Actin

# pAMPK

Y = Young  
M = Middle Aged

## Groups

1, 7, 13,19,25,31 = Young/NE  
2,8,14,20,26,32 = Middle-Aged/NE  
3,9,15,21,27,33 = Young/0,8 Km/h  
4,10,16,22,28,34 = Middle-Aged/0,8 Km/h  
5,11,17,23,29,35 = Young/1,2 Km/h  
6,12,18,24,30,36 = Middle-Aged/1,2 Km/h

| Y  | M | Y        | M | Y        | M |
|----|---|----------|---|----------|---|
| NE |   | 0,8 Km/h |   | 1,2 Km/h |   |

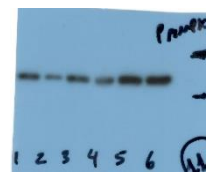

ASSAY 1

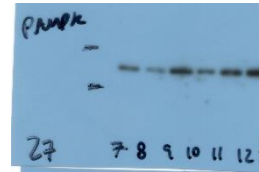

ASSAY 2

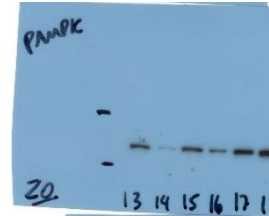

ASSAY 3

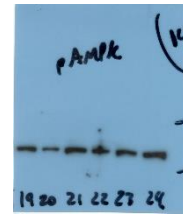

ASSAY 4

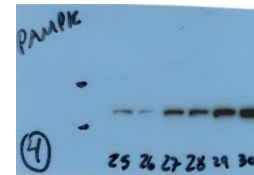

ASSAY 5

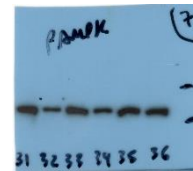

ASSAY 6

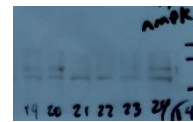

ASSAY 7/ AMPK total

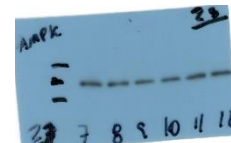

ASSAY 8/ AMPK total

# pACC

Y = Young

M = Middle Aged

## Groups

1, 7, 13, 19, 25, 31 = Young/NE

2, 8, 14, 20, 26, 32 = Middle-Aged/NE

3, 9, 15, 21, 27, 33 = Young/0,8 Km/h

4, 10, 16, 22, 28, 34 = Middle-Aged/0,8 Km/h

5, 11, 17, 23, 29, 35 = Young/1,2 Km/h

6, 12, 18, 24, 30, 36 = Middle-Aged/1,2 Km/h

| Y  | M | Y        | M | Y        | M |
|----|---|----------|---|----------|---|
| NE |   | 0,8 Km/h |   | 1,2 Km/h |   |

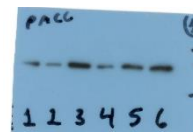

ASSAY 1

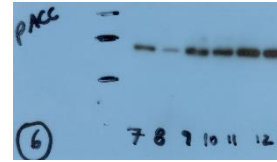

ASSAY 2

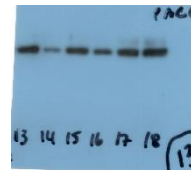

ASSAY 3

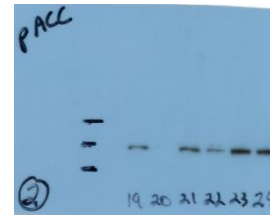

ASSAY 4

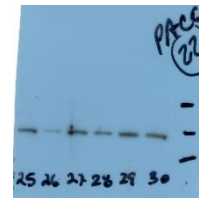

ASSAY 5

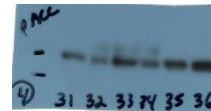

ASSAY 6

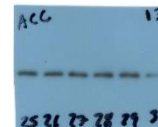

ASSAY 7/ ACC total

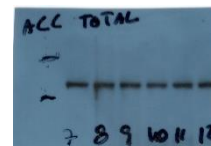

ASSAY 8/ ACC total

# SIRT1

Y = Young

M = Middle Aged

## Groups

1, 7, 13,19,25,31 = Young/NE

2,8,14,20,26,32 = Middle-Aged/NE

3,9,15,21,27,33 = Young/0,8 Km/h

4,10,16,22,28,34 = Middle-Aged/0,8 Km/h

5,11,17,23,29,35 = Young/1,2 Km/h

6,12,18,24,30,36 = Middle-Aged/1,2 Km/h

| Y  | M | Y        | M | Y        | M |
|----|---|----------|---|----------|---|
| NE |   | 0,8 Km/h |   | 1,2 Km/h |   |

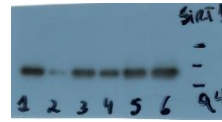

ASSAY 1

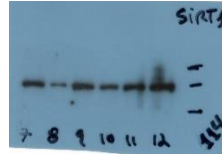

ASSAY 2

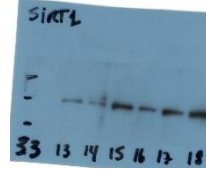

ASSAY 3

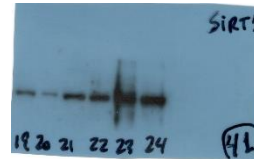

ASSAY 4

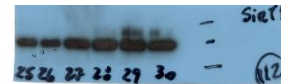

ASSAY 5

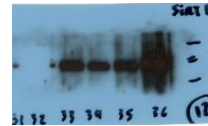

ASSAY 6

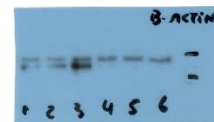

ASSAY 7/ ACC total/

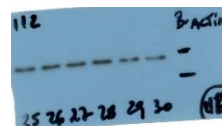

ASSAY 8/ ACC total

# PGC-1 $\alpha$

Y = Young  
M = Middle Aged

## Groups

1, 7, 13, 19, 25, 31 = Young/NE  
2, 8, 14, 20, 26, 32 = Middle-Aged/NE  
3, 9, 15, 21, 27, 33 = Young/0,8 Km/h  
4, 10, 16, 22, 28, 34 = Middle-Aged/0,8 Km/h  
5, 11, 17, 23, 29, 35 = Young/1,2 Km/h  
6, 12, 18, 24, 30, 36 = Middle-Aged/1,2 Km/h

|       |    |          |    |          |    |
|-------|----|----------|----|----------|----|
| YY    | MM | YY       | MM | YY       | MM |
| <hr/> |    | <hr/>    |    | <hr/>    |    |
| NE    |    | 0,8 Km/h |    | 1,2 Km/h |    |

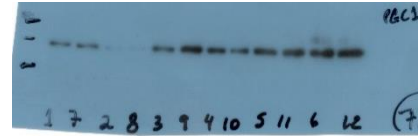

ASSAY 1

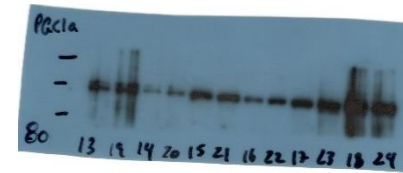

ASSAY 2

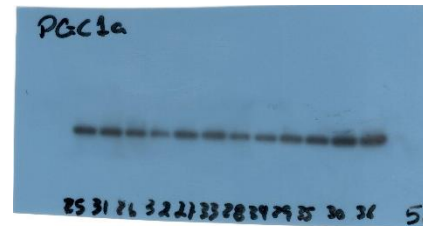

ASSAY 3

# CPT-1

Y = Young

M = Middle Aged

## Groups

1, 7, 13, 19, 25, 31 = Young/NE

2, 8, 14, 20, 26, 32 = Middle-Aged/NE

3, 9, 15, 21, 27, 33 = Young/0,8 Km/h

4, 10, 16, 22, 28, 34 = Middle-Aged/0,8 Km/h

5, 11, 17, 23, 29, 35 = Young/1,2 Km/h

6, 12, 18, 24, 30, 36 = Middle-Aged/1,2 Km/h

|       |   |          |   |          |   |
|-------|---|----------|---|----------|---|
| Y     | M | Y        | M | Y        | M |
| <hr/> |   | <hr/>    |   | <hr/>    |   |
| NE    |   | 0,8 Km/h |   | 1,2 Km/h |   |

OR

|       |    |          |    |          |    |
|-------|----|----------|----|----------|----|
| YY    | MM | YY       | MM | YY       | MM |
| <hr/> |    | <hr/>    |    | <hr/>    |    |
| NE    |    | 0,8 Km/h |    | 1,2 Km/h |    |

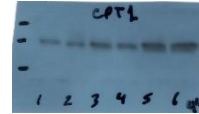

ASSAY 1

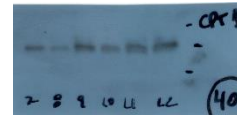

ASSAY 2

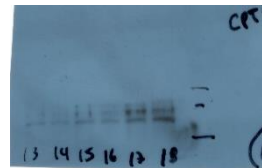

ASSAY 3

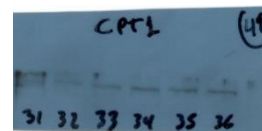

ASSAY 4

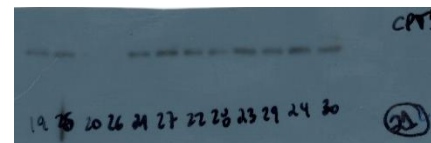

ASSAY 5

# CYT-C

Y = Young

M = Middle Aged

## Groups

1, 7, 13,19,25,31 = Young/NE

2,8,14,20,26,32 = Middle-Aged/NE

3,9,15,21,27,33 = Young/0,8 Km/h

4,10,16,22,28,34 = Middle-Aged/0,8 Km/h

5,11,17,23,29,35 = Young/1,2 Km/h

6,12,18,24,30,36 = Middle-Aged/1,2 Km/h

| Y  | M | Y        | M | Y        | M |
|----|---|----------|---|----------|---|
| NE |   | 0,8 Km/h |   | 1,2 Km/h |   |

OR

| YY | MM | YY       | MM | YY       | MM |
|----|----|----------|----|----------|----|
| NE |    | 0,8 Km/h |    | 1,2 Km/h |    |

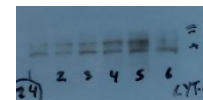

ASSAY 1

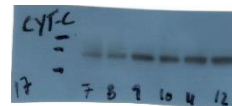

ASSAY 2

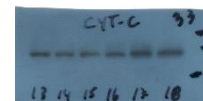

ASSAY 3

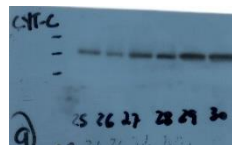

ASSAY 4

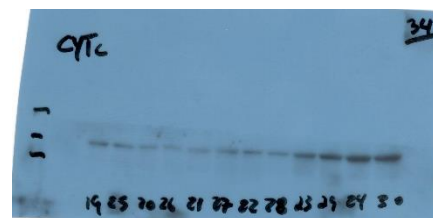

ASSAY 5

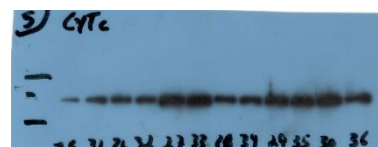

ASSAY 6

# SDH

Y = Young  
M = Middle Aged

## Groups

1, 7, 13,19,25,31 = Young/NE

2,8,14,20,26,32 = Middle-Aged/NE

3,9,15,21,27,33 = Young/0,8 Km/h

4,10,16,22,28,34 = Middle-Aged/0,8 Km/h

5,11,17,23,29,35 = Young/1,2 Km/h

6,12,18,24,30,36 = Middle-Aged/1,2 Km/h

| Y  | M | Y        | M | Y        | M |
|----|---|----------|---|----------|---|
| NE |   | 0,8 Km/h |   | 1,2 Km/h |   |

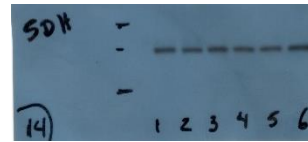

ASSAY 1

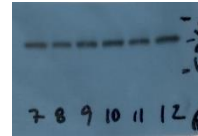

ASSAY 2

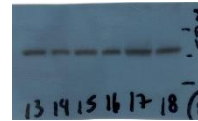

ASSAY 3

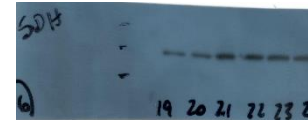

ASSAY 4

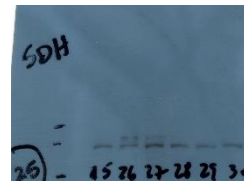

ASSAY 5

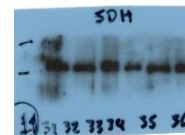

ASSAY 6

# Citrato Sintase

Y = Young

M = Middle Aged

## Groups

1, 7, 13, 19, 25, 31 = Young/NE

2, 8, 14, 20, 26, 32 = Middle-Aged/NE

3, 9, 15, 21, 27, 33 = Young/0,8 Km/h

4, 10, 16, 22, 28, 34 = Middle-Aged/0,8 Km/h

5, 11, 17, 23, 29, 35 = Young/1,2 Km/h

6, 12, 18, 24, 30, 36 = Middle-Aged/1,2 Km/h

| Y | M  | Y | M        | Y | M        |
|---|----|---|----------|---|----------|
|   |    |   |          |   |          |
|   | NE |   | 0,8 Km/h |   | 1,2 Km/h |

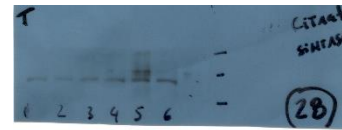

ASSAY 1

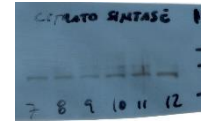

ASSAY 2

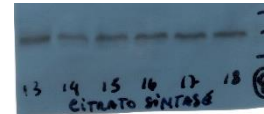

ASSAY 3

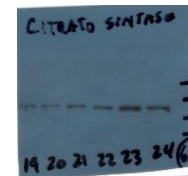

ASSAY 4

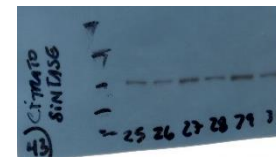

ASSAY 5

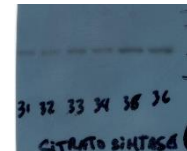

ASSAY 6

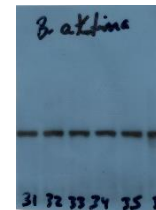

ASSAY 7/ $\beta$ -Actin

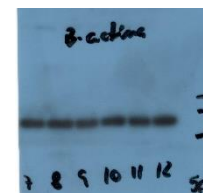

ASSAY 8/ $\beta$ -Actin
