# Supplementary figures and images for: Retracted: Treadmill Training Increases SIRT-1 and PGC-1α Protein Levels and AMPK Phosphorylation in Quadriceps of Middle-Aged Rats in an Intensity-Dependent Manner
Source: Hindawi journal article supplement (doi:10.1155/2017/8287646), 2017-10-16

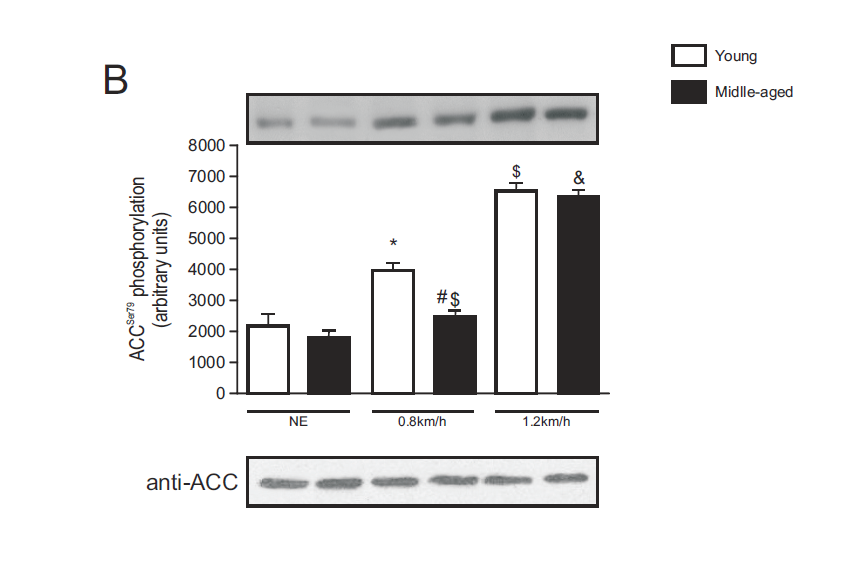

Supplement: f1 [file 8287646.f1.zip › Supplemetary Materials/Figure 2B.PNG]
